# Supplementary material for: A New Family of Giardial Cysteine-Rich Non-VSP Protein Genes and a Novel Cyst Protein
Source: PubMed Central journal article supplement (PMC1762436; doi:10.1371/journal.pone.0000044), 2006-12-20
Supplement: pone.0000044.s001.pdf [file pone.0000044.s001.pdf]

**Supporting Table 1.** Cysteine-Rich Proteins Not Classified As HCMp Because They Are Too Short And/Or Have  $\leq 20$  CxxC + CxC's

| <b>ORF ID</b> | <b>% Cysteine</b> | <b>Length (aa)</b> | <b>CxxC</b> | <b>CxC</b> | <b>GGCY</b> |
|---------------|-------------------|--------------------|-------------|------------|-------------|
| <b>34777</b>  | 12.5              | 40                 | 0           | 1          | 0           |
| <b>111877</b> | 10.9              | 55                 | 1           | 0          | 0           |
| <b>25013</b>  | 14.3              | 63                 | 3           | 3          | 0           |
| <b>32701</b>  | 10                | 100                | 2           | 1          | 0           |
| <b>35985</b>  | 11.3              | 115                | 4           | 2          | 0           |
| <b>114888</b> | 11.7              | 120                | 6           | 0          | 0           |
| <b>98126</b>  | 10.6              | 123                | 1           | 1          | 0           |
| <b>103943</b> | 10.3              | 185                | 8           | 0          | 0           |
| <b>28057</b>  | 11.5              | 191                | 10          | 0          | 0           |
| <b>17212</b>  | 10.7              | 206                | 0           | 5          | 0           |
| <b>9003</b>   | 11.3              | 212                | 11          | 0          | 0           |
| <b>102180</b> | 10.7              | 224                | 5           | 2          | 0           |
| <b>112604</b> | 10.7              | 224                | 5           | 2          | 0           |
| <b>14324</b>  | 10.9              | 239                | 6           | 2          | 0           |
| <b>14783</b>  | 11.7              | 308                | 12          | 0          | 1           |
| <b>87706</b>  | 11.8              | 348                | 17          | 0          | 0           |
| <b>14791</b>  | 12.6              | 350                | 18          | 0          | 0           |
| <b>101589</b> | 12.5              | 393                | 16          | 0          | 1           |
| <b>115158</b> | 10.13             | 454                | 15          | 0          | 1           |
| <b>17380</b>  | 12.3              | 511                | 16          | 3          | 1           |
| <b>6372</b>   | 12.4              | 533                | 1           | 10         | 0           |
| <b>101832</b> | 10.3              | 536                | 14          | 2          | 3           |
| <b>114161</b> | 11.2              | 556                | 1           | 10         | 0           |
| <b>137732</b> | 10.91             | 614                | 1           | 11         | 0           |
| <b>94003</b>  | 11.2              | 677                | 2           | 11         | 0           |
| <b>25238</b>  | 12.12             | 685                | 11          | 7          | 0           |

ORF ID numbers can be used to view data at GiardiaDB ([www.mbl.edu/Giardia](http://www.mbl.edu/Giardia)).
