# Supplementary material for: A New Family of Giardial Cysteine-Rich Non-VSP Protein Genes and a Novel Cyst Protein
Source: PubMed Central journal article supplement (PMC1762436; doi:10.1371/journal.pone.0000044), 2006-12-20

Supporting Figure 1. Diagram Of MEME/MAST Analyses Of The 9 HCMp Groupings

Group 1  
HCNCp

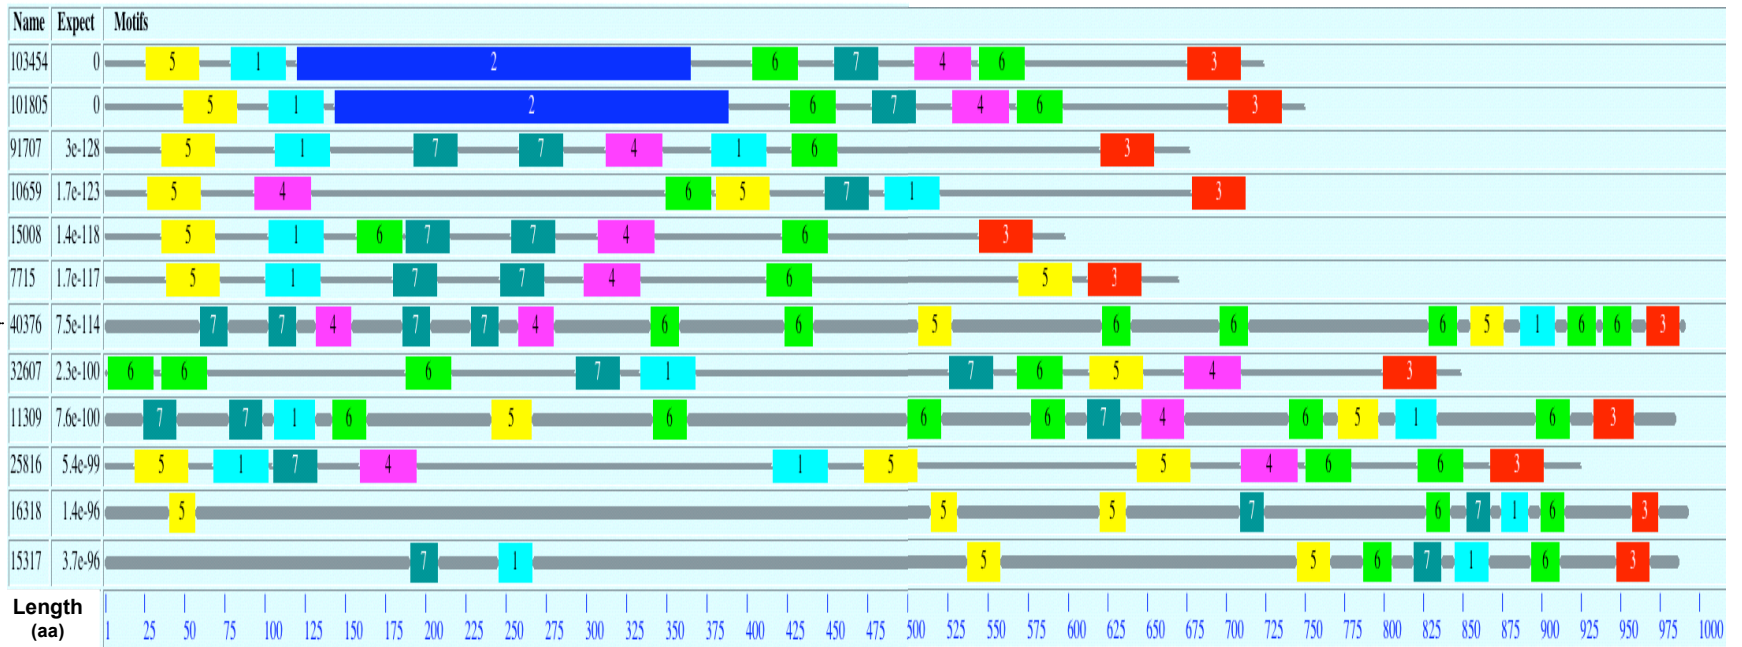

Group 2

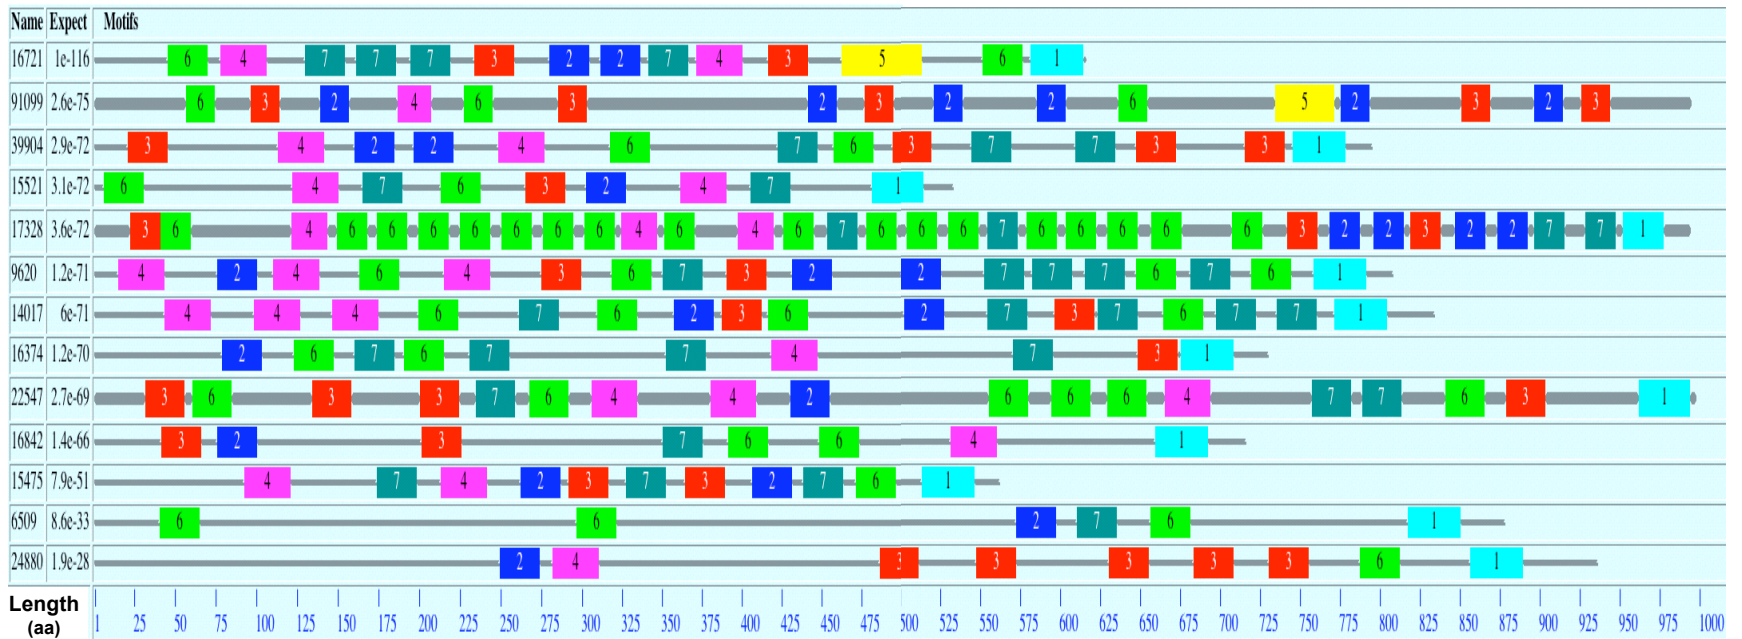

**Group 3**

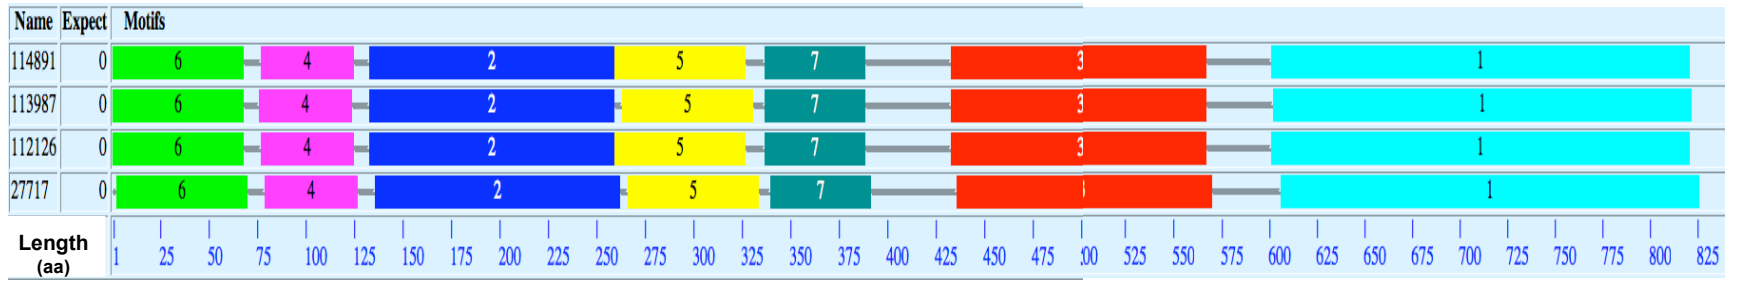

**Group 4**

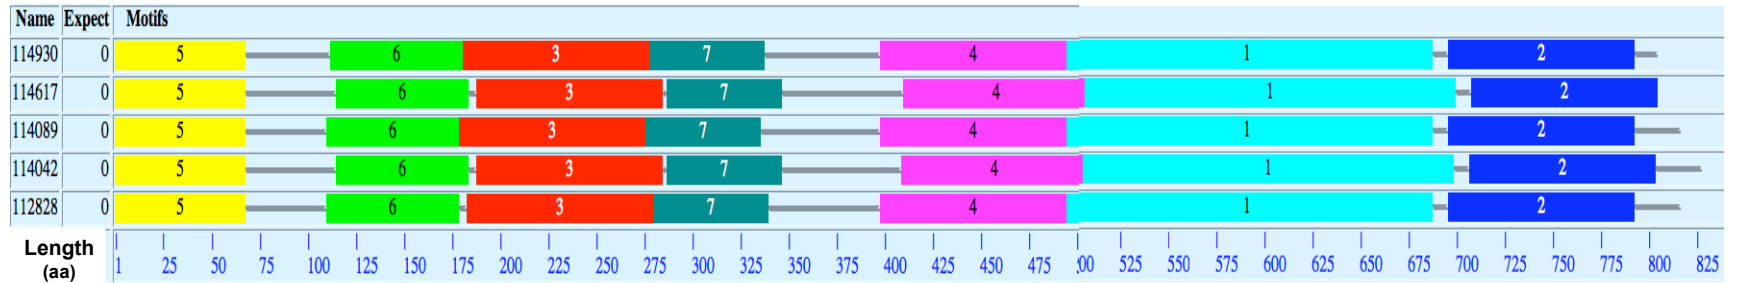

**Group 5**

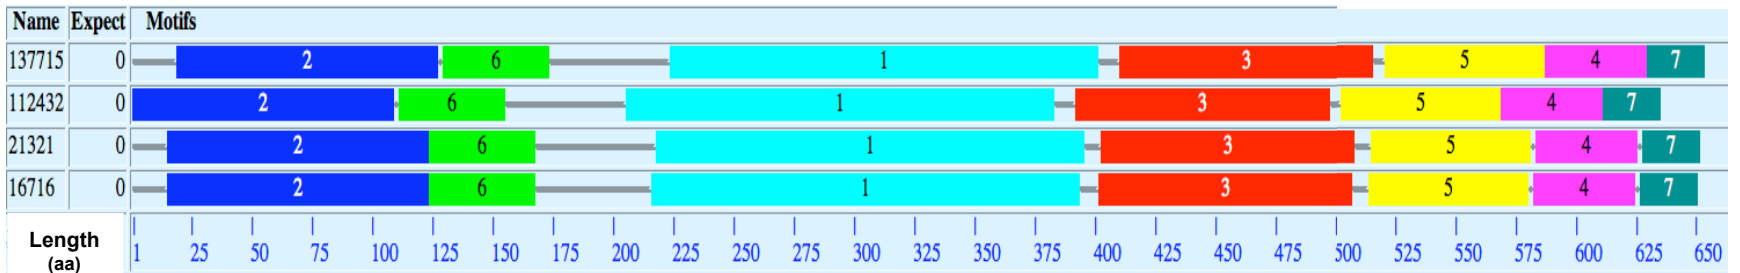

**Group 6**

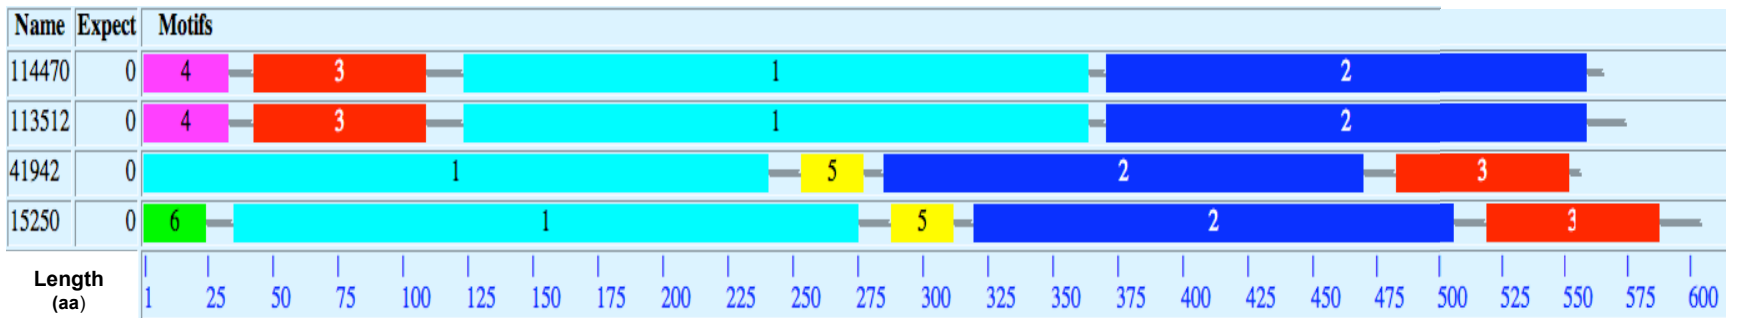

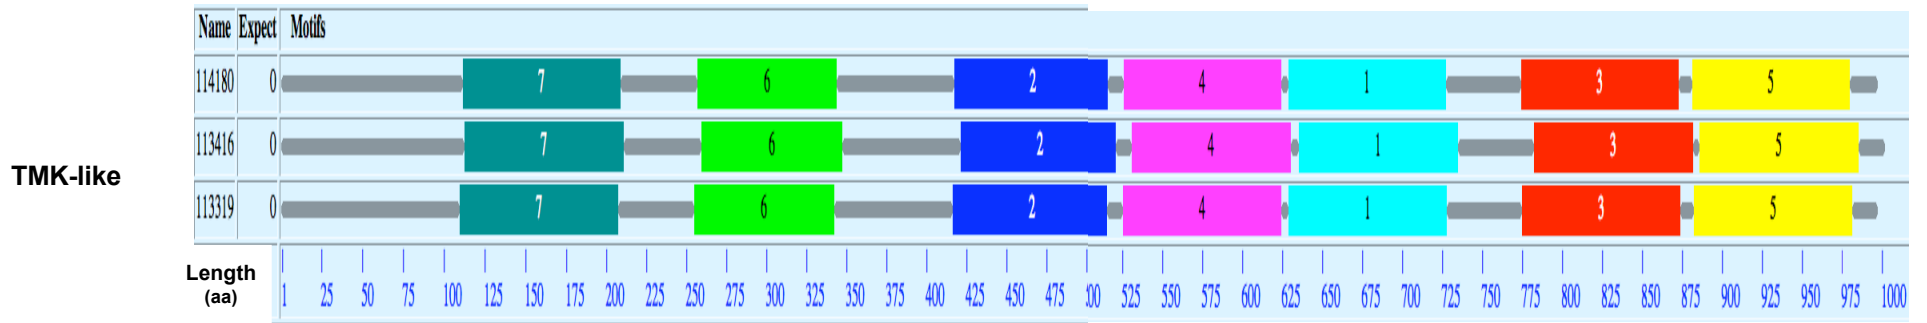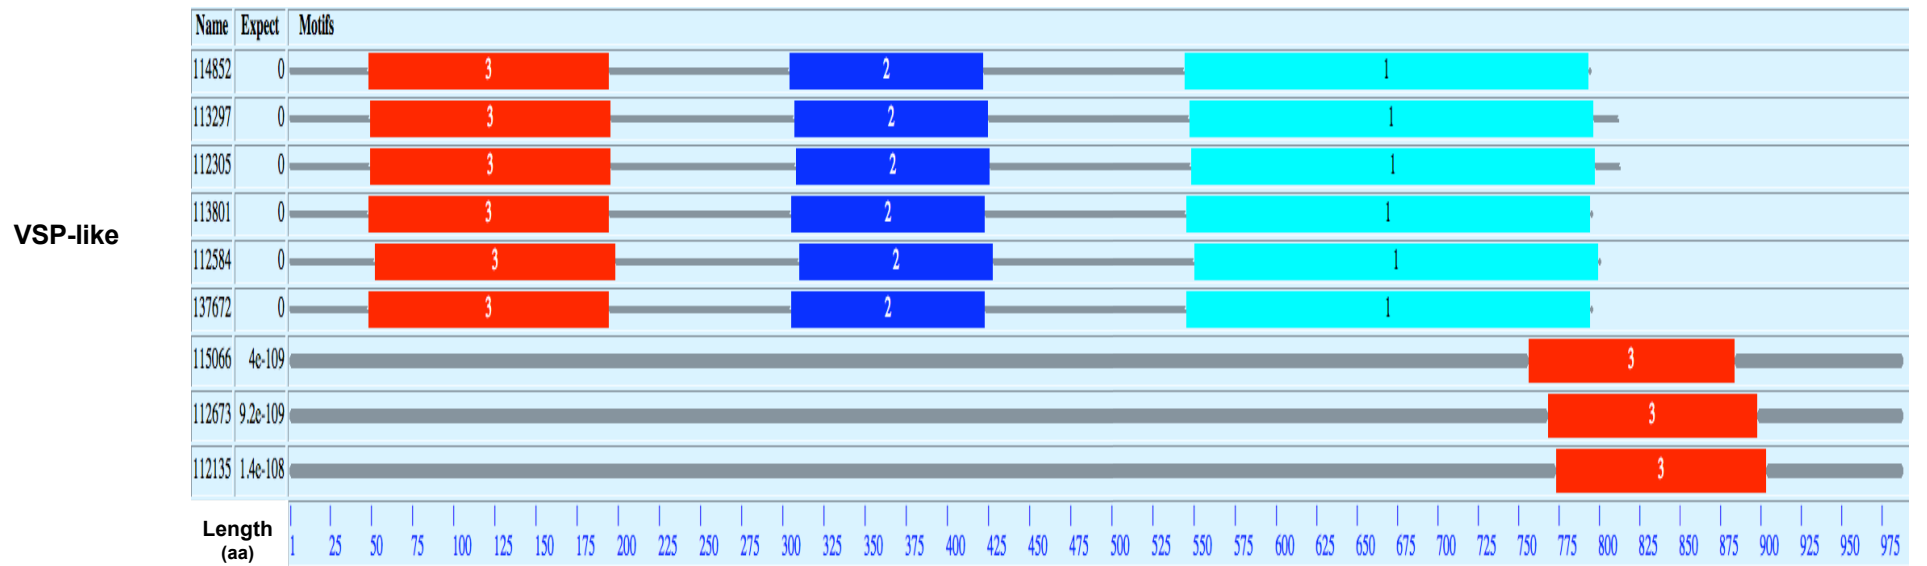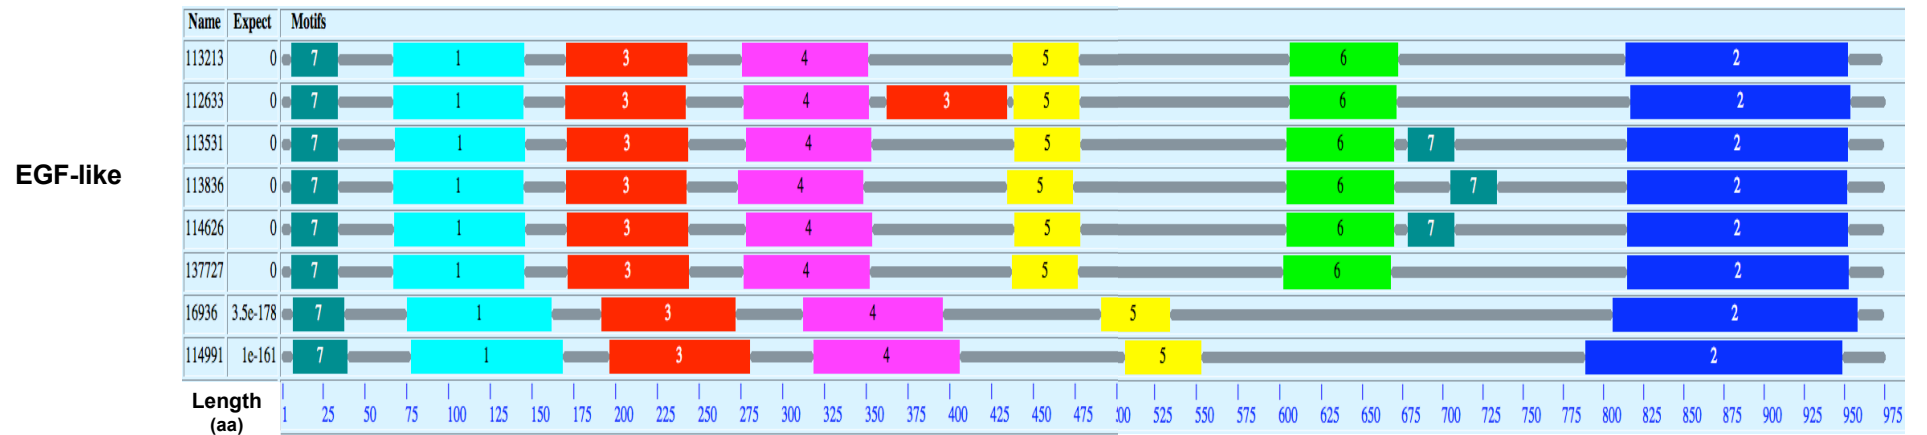

Supplement: pone.0000044.s002.pdf [file pone.0000044.s002.pdf]
