# Supplementary material for: A New Family of Giardial Cysteine-Rich Non-VSP Protein Genes and a Novel Cyst Protein
Source: PubMed Central journal article supplement (PMC1762436; doi:10.1371/journal.pone.0000044), 2006-12-20
Supplement: pone.0000044.s003.pdf [file pone.0000044.s003.pdf]

**Supporting Figure 2. Motif Sequences Found By MEME Analysis For The 9 HCMP Groupings**

| <b>MEME group</b> | <b>MEME motif ID</b> | <b>MEME motif length (aa)</b> | <b>MEME motif sequence</b>                                                                                                                                                                                                                                         |
|-------------------|----------------------|-------------------------------|--------------------------------------------------------------------------------------------------------------------------------------------------------------------------------------------------------------------------------------------------------------------|
| <b>Group 1</b>    | 1                    | 35                            | CTQCKDGYFLFMGGCYKIDRWPGNHVCKKAESGMC                                                                                                                                                                                                                                |
| <b>Group 1</b>    | 2                    | 250                           | KFLFTNPDDSAAERCILCYDNVGFSGYKGVGDCRYCLPPLTGETSAECNWCQNEKYGPIDGVCKEPRHLCAD<br>GACSNCYMTHIQHNGGCYTKTETVAQKICTTENQFQVINITACKKCAIKGEVPMDGRCIKGLLEPKCNYPNTDG<br>SCTDCKKGGVNYDTFLFNEGCYNSDYIGSQICSKVNERAECELWNIGDYGVFKPPDDHMAHPCSDTSARGIQ<br>GCSRCRYNNEEKKPCYDCEYDTLAFDRM |
| <b>Group 1</b>    | 3                    | 34                            | LSAMAIIGIAIIVMVVVGALVGLVWVWFLFRRRR                                                                                                                                                                                                                                 |
| <b>Group 1</b>    | 4                    | 36                            | FLFMGGCYNINKYPGRFICKWAFDGGKCTECMEHYGY                                                                                                                                                                                                                              |
| <b>Group 1</b>    | 5                    | 34                            | QMDRHHMKVMFVRGTEYCSQCRAHVPINGICV                                                                                                                                                                                                                                   |
| <b>Group 1</b>    | 6                    | 29                            | CRACHENCATCSGPQADQCLSCMPGKYWK                                                                                                                                                                                                                                      |
| <b>Group 1</b>    | 7                    | 28                            | QFEINGYHYCSKCKDQSEFPNGICKPH                                                                                                                                                                                                                                        |
| <b>Group 2</b>    | 1                    | 33                            | WMSMWMIVGISVFMIAIIVWIIWVFKRRK                                                                                                                                                                                                                                      |
| <b>Group 2</b>    | 2                    | 25                            | TCTRCAEGYFLWDGKCYPCCEMIPGK                                                                                                                                                                                                                                         |
| <b>Group 2</b>    | 3                    | 25                            | YEHEEYCLKCMPPGYMINGRCVHAN                                                                                                                                                                                                                                          |
| <b>Group 2</b>    | 4                    | 29                            | CKIRNCVKCHDDKQMCACKENFYLEKDG                                                                                                                                                                                                                                       |
| <b>Group 2</b>    | 5                    | 51                            | HRKRLFGRWLQQFQAKRADSQPANRRREDWEKELQGQQQYYREADIRVNNVR                                                                                                                                                                                                               |
| <b>Group 2</b>    | 6                    | 25                            | MCKECNTDNGQQCESCHEGYLDPT                                                                                                                                                                                                                                           |
| <b>Group 2</b>    | 7                    | 25                            | NCKQRDSATTCVECEPGYFLQPSRK                                                                                                                                                                                                                                          |
| <b>Group 3</b>    | 1                    | 220                           | GAKNVVCQKCEDGYLKEHDQNKVVCPEPPPPECTVELCAICVEDDPNRCEHCTAGAYLCPRTAACTKDCASCGG<br>SMYPDEDLGECQPCDIANCRVCATGLKCESCAENAVPISPDVYHTACMGCSDTGGMDGWVGLAGCTTCELTDK<br>GGGSVNCLDPGYRRRGGGLGGGAIAIIVVLLVLAVAGFLVWVVFRRRGRPRKRAKYTSLMRGESYDYRQSLI                                |
| <b>Group 3</b>    | 2                    | 129                           | GNTCDKGVCTTCGNGYFFHYGSCYKFDGSPGSIVCPNQDTTGTVCGSCGSKFVKNPSSASSATSCLACYGLD<br>GTLFCERCERMNVLTSADVKPTLCTQCKIGYVPVDGRCISNYSALAAALAGCSDPRGN                                                                                                                             |
| <b>Group 3</b>    | 3                    | 137                           | EPPEDNACQALPPATPEGCAVQGCQACSKDSATTCDACFEPLIMKEDKTKCFGSCALGPGYYNNSGICAPCV<br>ENLSCVDGTSCSQAEGYYLEVSGADSSTGACKPCAAGCSTCNDAGDSLCTCLFYGYIAFE                                                                                                                           |
| <b>Group 3</b>    | 4                    | 49                            | CIRDFLFYRGGCYRTASLINAICKEKHIVEEGMYCGACAIEGDVPIDGV                                                                                                                                                                                                                  |
| <b>Group 3</b>    | 5                    | 69                            | GLCEACSSGFMLFYGSCYSVDGPLAQAICKAEDQIYLNGRVFCRCAQPDHYPINGLCIAQKGDHTDEH                                                                                                                                                                                               |
| <b>Group 3</b>    | 6                    | 69                            | MRVLILLLLHGFSECTQSDSCGGATGVCNVTIGGKKYCSKCDGARVPVNGDCRLLSLSRSICIVPTGS                                                                                                                                                                                               |
| <b>Group 3</b>    | 7                    | 53                            | DTKQTADDTPEFFLFYNGCYDINHPIGKLICQEVSNACSTCNSNESSNIAN                                                                                                                                                                                                                |
| <b>Group 4</b>    | 1                    | 193                           | YPFNGVICPNTQRDAYCTSTANGACTTCSGAFLMNGGCYTTHEYPGSTICDKQSNKCTTTTKGYWISPDGKL<br>LECDPTCLACTAPGPRCTRCPDCLKKRASGAATGSCVDPGACVDGYADGDACLPCATPGCKTCGHASFACT<br>ECAGELFVSLDGGQSCLEECTGDKVVGEVPGGVRRCWCERGFPLALD                                                             |
| <b>Group 4</b>    | 2                    | 97                            | ECPPDMPWCAACDESGRCLLCVTSGHNVQVDQRTCAEGCGARASSNQGVCMCELDAVLTKGICVPAKELARK<br>RMAAIAGGTVAGVIVIGVLVGLFCW                                                                                                                                                              |
| <b>Group 4</b>    | 3                    | 97                            | YTKQDRHFYPIDYQCQAKGLHNCVNGYCTSCYKTHLFYEGCYSRHSSTGFAICAEANQYELDNVTICKECVNT<br>SHAPKNGACILIKENPSIMEFSD                                                                                                                                                               |
| <b>Group 4</b>    | 4                    | 97                            | VEEGSESKEVSCRVCMPFTYNSSGTCTPCTDSCAVCKDGTPTGCQQCSPGKILNFSIVSSENADCVDQCSVG<br>DECAECGITIDGSRYCTRCKDANM                                                                                                                                                               |
| <b>Group 4</b>    | 5                    | 68                            | MLGLLPLLLLASFCKASRDVYVYKFGVECEQHQENCAQDRCIFMGWDQLCTQCVPGYVPINGKCKQYP                                                                                                                                                                                               |
| <b>Group 4</b>    | 6                    | 69                            | FICSQASNGRCTECNVSTHEMYVFTNPDVSAAEKCILCSDTVGFNGYKASGCLDCLPPITDKIGIALC                                                                                                                                                                                               |
| <b>Group 4</b>    | 7                    | 60                            | CTKDPSKGLCTACPASAKSFLFYGGCYDRDSHIGSRCLSRIGSGVCEQWNSQFDWIFSKN                                                                                                                                                                                                       |

| MEME group | MEME motif ID | MEME motif length (aa) | MEME motif sequence                                                                                                                                                                                                                                                 |
|------------|---------------|------------------------|---------------------------------------------------------------------------------------------------------------------------------------------------------------------------------------------------------------------------------------------------------------------|
| Group 5    | 1             | 185                    | STCQPCQQGCAFCMDGEHQFPYRCLSGGCAQGYFHPYAQVCMKCPEGCMDCYDEAHSIPVCERCTDSSQ<br>LTVGPKIYGIWCSLDLPPKSCKEDEFQENGFICPCYLAIMGCIGCSDFRFRCTECQPGFYLDNICVRCDNCLACD<br>GPGTNCKNCWDGFLVQNGTCVPGVEIPNCLHADNTTDP                                                                      |
| Group 5    | 2             | 113                    | MNCPRDHYLLGNMVCEDDAMKWCLCERGPACTRCKAGYYLDHGKYCKPCDHTCERCNGPGKCLECSENHC<br>RNQDGVCEPDGDDVYEGCIRCVDHTGKCMQCHEGYFHNGKGF                                                                                                                                                |
| Group 5    | 3             | 110                    | GFYVADGACKKCVDNCLCKGPDISNMLGFEGYRYDSYKNQIEKCQDPNCERCAFTAKYCGTCKLGFYISPD<br>QKCAKQVENCMVYVYGQSKCSECIHGYGFSEGGDP                                                                                                                                                      |
| Group 5    | 4             | 44                     | KLDLNFSGRPGVIAAIVLIIIGFIVAIPFIVKVLVRRGVR                                                                                                                                                                                                                            |
| Group 5    | 5             | 69                     | EGIKGEYFDDICEFVGVQVGFYFAYGDSKLEPPEGASMMKQFKNNVVRGRTRSGQVFAISLVMGYLLH                                                                                                                                                                                                |
| Group 5    | 6             | 46                     | CTKCKDNCYSCKNETECERPASGYVNPSTGEPAPCTDHNCIDACD                                                                                                                                                                                                                       |
| Group 5    | 7             | 25                     | RSRLMKIDRGSEDHNEFELEEDLL                                                                                                                                                                                                                                            |
| Group 6    | 1             | 250                    | MICQDQYKIDVETGISVVPKGRWYMRIAHRKLWDSPKIHSDFCPKPDRCWACEDGYFLGWYGDKEAKILTGD<br>YEGQDWKGVVCLKNTEESGKADTPATCTCEQEGYLLIPEDPKSEILPDGRIGPHFPMRCENKKDYPLEENAN<br>GNRENRAYDDFHPNELGKAVLQKNSKGYNDEKLPKNKDISED SAPVYSYEDQILEPPAHKVKCDGYYKESNS<br>IACYPGFDNRLSDGISANAVIQEGTRQY   |
| Group 6    | 2             | 192                    | QQLAIVDDSKFCGDDKAGYQPVDFMLDNKERVPVNGTPGPNVRSATVGERFEQSKRCQQGYYYPGNRLARS<br>VGNKDTKSANIQAEDGYSLPADPDLNKPVDVDPQQISNCLPGYYNSRDKCVKCDAGYNWANEPNCVV<br>AAPPSSNGQDSNQSVEGSGCGRGYGMRGGLSPPAIGDSVVVIFRVD                                                                    |
| Group 6    | 3             | 69                     | YAGELPINGQCKQIVRMARRTIFCKKVNGLTVLVEDKVIERGLFFYFRKGGRYHVDNEPGQKLCIQEHE                                                                                                                                                                                               |
| Group 6    | 4             | 34                     | MLLTAF CIMASVLAATCTVEANTRDCAESKCEMV                                                                                                                                                                                                                                 |
| Group 6    | 5             | 25                     | LCFDGYGPNETGSC TPCPDGKGGPN                                                                                                                                                                                                                                          |
| Group 6    | 6             | 25                     | MLMSMFVIMLLVRAATCAVEDVDRD                                                                                                                                                                                                                                           |
| TMK-like   | 1             | 250                    | RVICTRCKDKHPISEDSRCSQSCNDRSSESGNCKAGSCTAMGSLYCSRCALDDEWPINGACTGHDTDYVCEK<br>GKGVCTGLRGYMLYMGCCYDPAIIPGSGICRELLTVGGRTYCKQCNLAGEFPINGLCTKDVPDGVSCSSGLCV<br>ICPENYFFHEGGCYDITTTTPGSGICEVLGTGRDAGTCRRCRPGYRHNKELTCMCSAVSNCASCEIDVKYCTECI<br>QPYTLTGVGAGAYCTKPKRVGQDACS  |
| TMK-like   | 2             | 250                    | PPDRSSVSDSCVPTENS DTLKGIHPCKSCKVSNGLLVACEQFYRPMNGGTECVQTCVEAEADPKEHRCKR<br>DKCDVLTGFYCSQCAADAEGPVNGVCASVAAGVCIQYKQANGTKYCTHGYIKYKGGCYEAGSFEAGDICDAQ<br>DVVTSGAGSFCACKKQKDEVPVDGECKVSDCTVKGDGICRSCKQGVKSFQITKDGSPATVACFTKCPDGMYE<br>SAEFCQMCDKSKCTCQD SAAKCTGCADGFYL |
| TMK-like   | 3             | 250                    | HCGDGMFLFEGACYTKGRAPGTSICGDDTESTSGCNACEAGFSKTDKGCVRCSDPNCGACVDDPNTCTACRA<br>GYLLQSTSCIACHPACKTCDGMGADKCKEAEYFGTFATPLGLACLACSDTSGRDWSVWVSGCRLCEAPKVA<br>GPALCKDCLPGYKALSTGTEVTCHAVCPMTYYEAADSCIPCAIDNCATCTSTRCTSCVPEHIWNGEECVPKICPP<br>QCLCREQSIACIGCENAVEVRPTHSSASR |
| TMK-like   | 4             | 250                    | QDGYASGNSCVACTPGCKKCDSTGCKVCKDRFALRNNICIEECPVGLLSTSCAAGYCNVNGTLACSRCALLSS<br>VIIDGKCKANDDACIRTPSSGTCAACKDTHLLYGGCYAKGAAAGTAICDSQHATLGPYTICKQCKRDGEVPID<br>GSCVALANTRAIRSQVAATPSPTSCTRCGPRFFLHAGGCYEIGRSPGTVLCVAVDSAVAGVCTSCASGYST<br>GLLDPTKESCILCNDTGATNGYTGVD     |
| TMK-like   | 5             | 250                    | RLADRVGPVVCLACESGRKALTDGMLLCPDRDCTEGFWTSGRECIPCAPGCLRCTSAATCSACSQGYSTQS<br>SVSAPSDCRPCDDVTSQNGFTGIPHCAVCAADRARAGVTCHACAEGYGLSGGSCSPCTAAGCARCDGGVCTS<br>CKRGWHLGADRCLACPSPCAACSSAASCLACADGYFQATLLGGPRDVCPCDQTAPQGLQMAIGHGCLCQAQ<br>AWSGAVLCLRCADGNLPLENYCGSSVKRRLGP  |
| TMK-like   | 6             | 221                    | KVCEEIGIGPKCIYGGCTVRDNTFCSRCSEAEVPIIDGVCSLPRERARICLNMSGRCLRCAATHLLYGGCYKI<br>TQPVIEICKQDHQIVEKFAYCKACNDAGEYVVDGSC TAE LDGNTCTSSKCTACGSGYFMHRGICMRQEFHSDI<br>CARVGAGVCEECSYFKNPVASTAIDSCIHCSDTAGSNYTGIDHCDTCLPPKAAGPAHCTDCADRYILNE                                   |
| TMK-like   | 7             | 250                    | DKKICTPFPDPNGMCSNCAKGHLLFQGGCYSVAEPLGQEVCAETSEVQERTVCVRCAPGFPVSVGVCLRYDA<br>QEVAAVGCVTSRGSVPTDITTCASCGAKAFLYKGGCYSNETSPGNVICDELDTGGCKVCRNKYFRSGSTCA<br>PCHQSCETCSSGAADSLCKKDVFFVFSGGRGMCKPCNDPVATITIVGVANCERCSPKPSGMTPICTKCTTG<br>HVLKGNHCVQVCHEGAEGPGQCKTGHCNTI    |

| <b>MEME group</b> | <b>MEME motif ID</b> | <b>MEME motif length (aa)</b> | <b>MEME motif sequence</b>                                                                                                                                                                                                                                           |
|-------------------|----------------------|-------------------------------|----------------------------------------------------------------------------------------------------------------------------------------------------------------------------------------------------------------------------------------------------------------------|
| <b>VSP-like</b>   | 1                    | 250                           | PAKRRLQYSDGAKGSCVPQCVDSSCAECGLTVGGTSSYCSRCVKSTEYPNNGACTSSSSRAAGIACANVAAGR<br>CVACSSNSFSLNGGCYTSTLLPGKTVCTKASDGWCDSTVAGYGITYNGTLLTCTPTNCAMCSSGVCACNSGFYL<br>EKGACKACSKGCATCPHGEACFDCLAGYFSESTCKACHKAISKSLCVVPEGAVKPCILEYDNTSKKSALSSG<br>AISGIAIGVVLVGGVA AVLWVFFVFRKK |
| <b>VSP-like</b>   | 2                    | 120                           | QIESQICQAMQNNVCTT CNSSTKEVFTKNNGCWRCGDSANGGIEGCQRCEMKD SGLQCLECRDLYLSLDRKRC<br>LASC PKGQKGIQGSSSVHSCACDDGSYLKDGKCVGCAVENCAECDE                                                                                                                                       |
| <b>VSP-like</b>   | 3                    | 149                           | IMFFCTECEQDYQPIFPKNVKT VDEKARRAGCVKSPMGGWCTKCN DGYFLFYGGCYQLDQYWKRTICHRAERG<br>ICQECAHGKMMYPIIFTNP NITSPERICHDGDIVGFGGYSGVYQQQKNQHRIPWNIIPDNPMSEHQMTPTYQ<br>R                                                                                                        |
| <b>EGF-like</b>   | 1                    | 137                           | DYSGQEATKAPCNGRGRCLLKDPGLAGLSADDYACDCYPIYRGGLCQSCDDANAIAE SSSDALPTCNARAC<br>QDSDGVVCSGGQGT CILDVGLDRESYHYRCKCNDGYTRVGHKCVRTECVATIDGSPV VCGGF GKC                                                                                                                     |
| <b>EGF-like</b>   | 2                    | 232                           | FQNLPGQNGCVHSSCVSSDNKLC SFGACEKTGDTYGCLCASYYTLVDKDCIPTRCLKDGKVCN GGGTCSGEG<br>SSATCSCSQGWTLHGTL CYPSACVSGGTLCGGNGDCQLSDGGSCSCRSGYETVSGGLCISSQCVQRGTDGTV<br>TICGGNGRCVSENGVKPSCICDEGFSLTSD FVCGVPAPSNKSSAGTTAAIVVVLLVAVAGFLVWV FVIRPRK<br>GGPLRERAPRKP                |
| <b>EGF-like</b>   | 3                    | 127                           | RRNAGYYCDDRGLATGDLLDTCTPEKSAIQIGDKCVPVGCLTSNNQESCKNGGT CVKSDGEYHCRCPDMLIAVH<br>GECTSPACMDEELGKVC SGHGTCTDDPRNIQCTCEQDYTYIAPGRCILSSLVD                                                                                                                                |
| <b>EGF-like</b>   | 4                    | 132                           | PDPQPLRMATAQDICNGTQGYTTFGDPSNPFITCVPKDASDGNVSAYNGTFSAKPGCVFISKIDKTRRFFCGFL<br>ENVTENLPTNNLPTCAK PSEKPDLPETCTHCPTDFHLVHFGENNKTCMHKDCHDGQS                                                                                                                             |
| <b>EGF-like</b>   | 5                    | 69                            | DNIRNPDINVHVC SGKGVCAYNQLTGRYGCECEDGLEAFGGYCTHPGCAGKVMHNGELKYVECKVYDGS                                                                                                                                                                                               |
| <b>EGF-like</b>   | 6                    | 113                           | PDGYEELDGFCLPKACIFEITLDNQMQRTMCGGKQFGTCVLNATQQSKSYCKINRYDIIQITNGKCMKRTCLS<br>DSLPGNPFQYVECSGHGKCKGDHIVGYSCNCDENYQTV                                                                                                                                                  |
| <b>EGF-like</b>   | 7                    | 49                            | LAEACGTGPACVHGDCAYGDGAHFCQRRGWAGAACDAPRAGFRRVTT S                                                                                                                                                                                                                    |
